# Supplementary material for: Mitochondrial and chloroplast genomes provide insights into the evolutionary origins of quinoa (Chenopodium quinoa Willd.)
Source: PubMed Central journal article supplement (PMC6336861; doi:10.1038/s41598-018-36693-6), 2019-01-17
Supplement: 41598_2018_36693_MOESM1_ESM.pdf [file 41598_2018_36693_MOESM1_ESM.pdf]

Mitochondrial and chloroplast genomes provide insights into the evolutionary origins of quinoa (*Chenopodium quinoa* Willd.)

Peter J. Maughan, Lindsay Chaney, Damien J. Lightfoot, Brian J. Cox, Mark Tester, Eric N. Jellen, David E. Jarvis

**Supplementary Figure 1.** Comparison of quinoa chloroplast assemblies. (A) Circular representation of BLAST sequence similarity of previously reported complete chloroplast assemblies relative to that of PI 614886. From the outside, tracks represent annotated genes in PI 614886 in the forward and reverse directions, similarity of PI 510550, similarity of PI 433232, similarity of 'Real', and sequencing read depth of the re-sequenced 'Real' accession. (B) BLAST sequence similarity of the chloroplasts of the PI 614886 assembly, the 'Real' assembly, and the 'Real' consensus sequence based on re-sequencing data, compared to *Arabidopsis ycf1* (blue) and *Arabidopsis ndhF* (red).

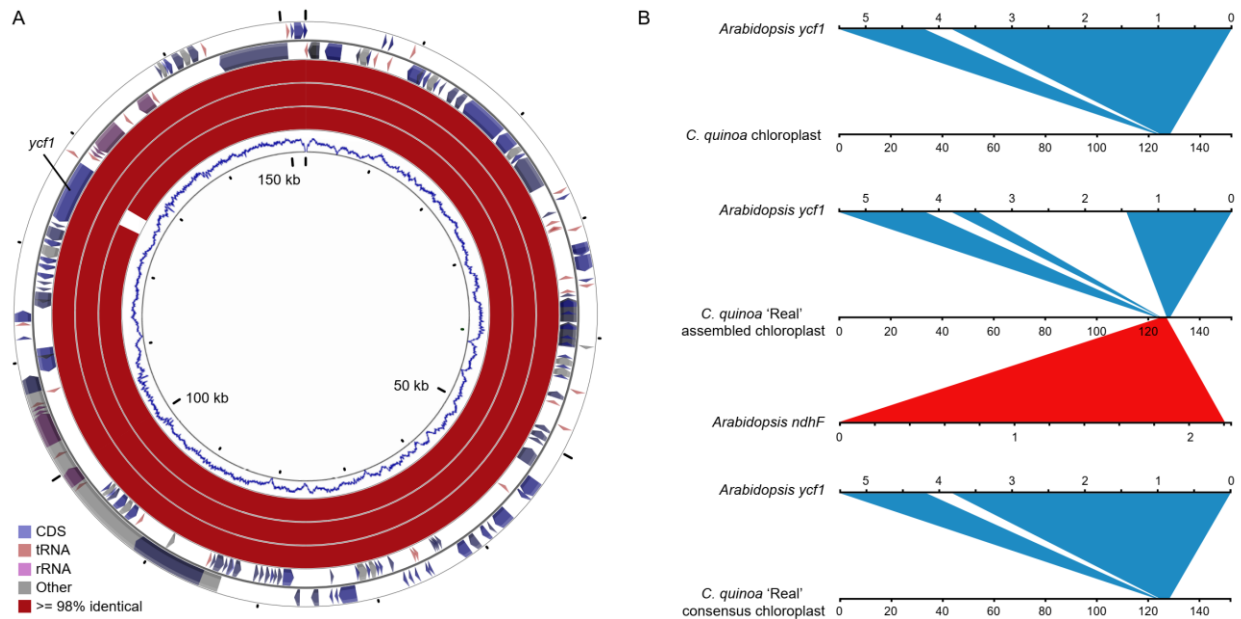

**Supplementary Table S1.** Species used in this study.

| Species          | Accession      | Origin     | Type     | Ecotype       | Ploidy   | Source           |
|------------------|----------------|------------|----------|---------------|----------|------------------|
| <i>C. quinoa</i> | 0654           | Peru       | Highland | Altiplano     | 2n=4x=36 | CIP-FAO          |
| <i>C. quinoa</i> | Cherry Vanilla | Oregon, US | Coastal  | Coastal       | 2n=4x=36 | Wild Garden Seed |
| <i>C. quinoa</i> | Chucapaca      | Bolivia    | Highland | Altiplano     | 2n=4x=36 | CIP-FAO          |
| <i>C. quinoa</i> | CICA-17        | Peru       | Highland | Andean Valley | 2n=4x=36 | CIP-FAO          |
| <i>C. quinoa</i> | G-205-95DK     | Denmark    | Coastal  | Coastal       | 2n=4x=36 | CIP-FAO          |
| <i>C. quinoa</i> | Ku-2           | Chile      | Coastal  | Coastal       | 2n=4x=36 | CIP-FAO          |
| <i>C. quinoa</i> | Kurmi          | Bolivia    | Highland | Altiplano     | 2n=4x=36 | PROINPA          |
| <i>C. quinoa</i> | Ollague        | Chile      | Highland | Salares       | 2n=4x=36 | CIP-FAO          |

|                                                    |              |                |          |                            |            |                   |
|----------------------------------------------------|--------------|----------------|----------|----------------------------|------------|-------------------|
| <i>C. quinoa</i>                                   | Pasankalla   | Peru           | Highland | Andean Valley              | $2n=4x=36$ | BYU Collection    |
| <i>C. quinoa</i>                                   | PI 614886    | Chile          | Coastal  | Coastal                    | $2n=4x=36$ | USDA-NPGS         |
| <i>C. quinoa</i>                                   | PI 634921    | Chile          | Coastal  | Coastal                    | $2n=4x=36$ | USDA-NPGS         |
| <i>C. quinoa</i>                                   | Real         | Bolivia        | Highland | Salares                    | $2n=4x=36$ | CIP-FAO           |
| <i>C. quinoa</i>                                   | Regalona     | Chile          | Coastal  | Coastal                    | $2n=4x=36$ | Semillas Baer     |
| <i>C. quinoa</i>                                   | Salcedo INIA | Peru           | Highland | Altiplano                  | $2n=4x=36$ | CIP-FAO           |
| <i>C. berlandieri</i><br>subsp. <i>nuttalliae</i>  | PI 568156    | Mexico         |          | Cultivated<br>(huauzontle) | $2n=4x=36$ | USDA-NPGS         |
| <i>C. berlandieri</i> var.<br><i>boscianum</i>     | BYU 937      | Texas, US      |          | Wild/weedy                 | $2n=4x=36$ | BYU Collection    |
| <i>C. berlandieri</i> var.<br><i>macrocalycium</i> | PI 666279    | Maine, US      |          | Wild/weedy                 | $2n=4x=36$ | USDA-NPGS         |
| <i>C. berlandieri</i> var.<br><i>sinuatum</i>      | Ames 33013   | Arizona, US    |          | Wild/weedy                 | $2n=4x=36$ | USDA-NPGS         |
| <i>C. berlandieri</i> var.<br><i>zschackei</i>     | BYU 1314     | Utah, US       |          | Wild/weedy                 | $2n=4x=36$ | BYU Collection    |
| <i>C. hircinum</i>                                 | BYU 1101     | Argentina      |          | Weedy<br>(pampas)          | $2n=4x=36$ | Daniel Bertero    |
| <i>C. hircinum</i>                                 | BYU 566      | Chile          |          | Weedy<br>(desert valley)   | $2n=4x=36$ | Francisco Fuentes |
| <i>C. pallidicaule</i>                             | Ames 13221   | Bolivia        |          | Cultivated<br>(kaniwa)     | $2n=2x=18$ | USDA-NPGS         |
| <i>C. suecicum</i>                                 | 328/6        | Czech Republic |          | Weedy                      | $2n=2x=18$ | Helena Storchova  |

**Supplementary Table S2.** SSRs in the mitochondrial genomes of *Chenopodium* species.

| Species                                           | Accession      | Mono | Di | Tri | Tetra | Penta | Hexa | Total |
|---------------------------------------------------|----------------|------|----|-----|-------|-------|------|-------|
| <i>C. quinoa</i>                                  | 0654           | 7    | 4  | 8   | 25    | 4     | 0    | 48    |
| <i>C. quinoa</i>                                  | Cherry Vanilla | 7    | 4  | 8   | 25    | 4     | 0    | 48    |
| <i>C. quinoa</i>                                  | Chucapaca      | 9    | 4  | 8   | 25    | 4     | 0    | 50    |
| <i>C. quinoa</i>                                  | CICA-17        | 7    | 4  | 8   | 25    | 4     | 0    | 48    |
| <i>C. quinoa</i>                                  | G-205-95DK     | 8    | 4  | 8   | 25    | 4     | 0    | 49    |
| <i>C. quinoa</i>                                  | Ku-2           | 8    | 4  | 8   | 25    | 4     | 0    | 49    |
| <i>C. quinoa</i>                                  | Kurmi          | 7    | 4  | 8   | 25    | 4     | 0    | 48    |
| <i>C. quinoa</i>                                  | Ollague        | 7    | 4  | 8   | 25    | 4     | 0    | 48    |
| <i>C. quinoa</i>                                  | Pasankalla     | 8    | 4  | 8   | 25    | 4     | 0    | 49    |
| <i>C. quinoa</i>                                  | PI 614886      | 9    | 4  | 8   | 25    | 4     | 0    | 50    |
| <i>C. quinoa</i>                                  | PI 634921      | 9    | 4  | 8   | 25    | 4     | 0    | 50    |
| <i>C. quinoa</i>                                  | Real           | 7    | 4  | 8   | 25    | 4     | 0    | 48    |
| <i>C. quinoa</i>                                  | Regalona       | 8    | 4  | 8   | 25    | 4     | 0    | 49    |
| <i>C. quinoa</i>                                  | Salcedo INIA   | 7    | 4  | 8   | 25    | 4     | 0    | 48    |
| <i>C. berlandieri</i><br>subsp. <i>nuttalliae</i> | PI 568156      | 7    | 4  | 8   | 25    | 3     | 0    | 47    |

|                                                 |            |    |   |   |    |   |   |    |
|-------------------------------------------------|------------|----|---|---|----|---|---|----|
| <i>C. berlandieri</i> var. <i>boscianum</i>     | BYU 937    | 7  | 4 | 7 | 24 | 4 | 0 | 46 |
| <i>C. berlandieri</i> var. <i>macrocalycium</i> | PI 666279  | 7  | 4 | 8 | 25 | 4 | 0 | 48 |
| <i>C. berlandieri</i> var. <i>sinuatum</i>      | Ames 33013 | 9  | 4 | 7 | 25 | 4 | 0 | 49 |
| <i>C. berlandieri</i> var. <i>zschackei</i>     | BYU 1314   | 6  | 4 | 8 | 25 | 4 | 0 | 47 |
| <i>C. hircinum</i>                              | BYU 1101   | 8  | 3 | 8 | 25 | 4 | 0 | 48 |
| <i>C. hircinum</i>                              | BYU 566    | 8  | 4 | 8 | 25 | 4 | 0 | 49 |
| <i>C. pallidicaule</i>                          | Ames 13221 | 8  | 4 | 5 | 21 | 4 | 0 | 42 |
| <i>C. suecicum</i>                              | 328/6      | 11 | 5 | 6 | 17 | 6 | 0 | 45 |

**Supplementary Table S3.** SSRs in the chloroplast genomes of *Chenopodium* species.

| Species                                         | Accession      | Mono | Di | Tri | Tetra | Penta | Hexa | Total |
|-------------------------------------------------|----------------|------|----|-----|-------|-------|------|-------|
| <i>C. quinoa</i>                                | 0654           | 5    | 3  | 1   | 6     | 1     | 0    | 16    |
| <i>C. quinoa</i>                                | Cherry Vanilla | 5    | 2  | 1   | 6     | 1     | 0    | 15    |
| <i>C. quinoa</i>                                | Chucapaca      | 4    | 3  | 1   | 6     | 1     | 0    | 15    |
| <i>C. quinoa</i>                                | CICA-17        | 5    | 3  | 1   | 6     | 1     | 0    | 16    |
| <i>C. quinoa</i>                                | G-205-95DK     | 5    | 3  | 1   | 6     | 1     | 0    | 16    |
| <i>C. quinoa</i>                                | Ku-2           | 5    | 3  | 1   | 6     | 1     | 0    | 16    |
| <i>C. quinoa</i>                                | Kurmi          | 5    | 3  | 1   | 6     | 1     | 0    | 16    |
| <i>C. quinoa</i>                                | Ollague        | 5    | 3  | 1   | 6     | 1     | 0    | 16    |
| <i>C. quinoa</i>                                | Pasankalla     | 5    | 3  | 1   | 6     | 1     | 0    | 16    |
| <i>C. quinoa</i>                                | PI 614886      | 4    | 2  | 1   | 6     | 1     | 0    | 14    |
| <i>C. quinoa</i>                                | PI 634921      | 4    | 1  | 1   | 6     | 1     | 0    | 13    |
| <i>C. quinoa</i>                                | Real           | 5    | 3  | 1   | 6     | 1     | 0    | 16    |
| <i>C. quinoa</i>                                | Regalona       | 5    | 3  | 1   | 6     | 1     | 0    | 16    |
| <i>C. quinoa</i>                                | Salcedo INIA   | 5    | 3  | 1   | 6     | 1     | 0    | 16    |
| <i>C. berlandieri</i> subsp. <i>nuttalliae</i>  | PI 568156      | 5    | 3  | 1   | 6     | 1     | 0    | 16    |
| <i>C. berlandieri</i> var. <i>boscianum</i>     | BYU 937        | 5    | 1  | 1   | 6     | 1     | 1    | 15    |
| <i>C. berlandieri</i> var. <i>macrocalycium</i> | PI 666279      | 3    | 3  | 1   | 6     | 1     | 0    | 14    |
| <i>C. berlandieri</i> var. <i>sinuatum</i>      | Ames 33013     | 4    | 3  | 1   | 6     | 1     | 0    | 15    |
| <i>C. berlandieri</i> var. <i>zschackei</i>     | BYU 1314       | 4    | 3  | 1   | 6     | 0     | 2    | 16    |
| <i>C. hircinum</i>                              | BYU 1101       | 4    | 3  | 1   | 6     | 1     | 0    | 15    |
| <i>C. hircinum</i>                              | BYU 566        | 4    | 3  | 1   | 6     | 1     | 0    | 15    |
| <i>C. pallidicaule</i>                          | Ames 13221     | 6    | 1  | 1   | 6     | 0     | 0    | 14    |
| <i>C. suecicum</i>                              | 328/6          | 7    | 1  | 1   | 7     | 0     | 0    | 16    |
